# Supplementary material for: Unusual upconversion emission from single NaYF4:Yb3+/Ho3+ microrods under NIR excitation
Source: Royal Society of Chemistry journal article supplement (doi:10.1039/c4ce00627e), 2014-01-01
Supplement: c4ce00627e1.pdf [file c4ce00627e1.pdf]

## Supporting information

### Unusual Upconversion Emission from Single NaYF<sub>4</sub>: Yb<sup>3+</sup>/Ho<sup>3+</sup> Microrod with NIR Excitation

Wei Gao, Hai-Rong Zheng\*, Qing-Yan Han, En-Jie He, Rui-Bo Wang

*School of Physics and Information Technology, Shaanxi Normal University, Xi'an  
710062, China*

\*Corresponding author: Hairong Zheng

E-mail: [hrzheng@snnu.edu.cn](mailto:hrzheng@snnu.edu.cn)

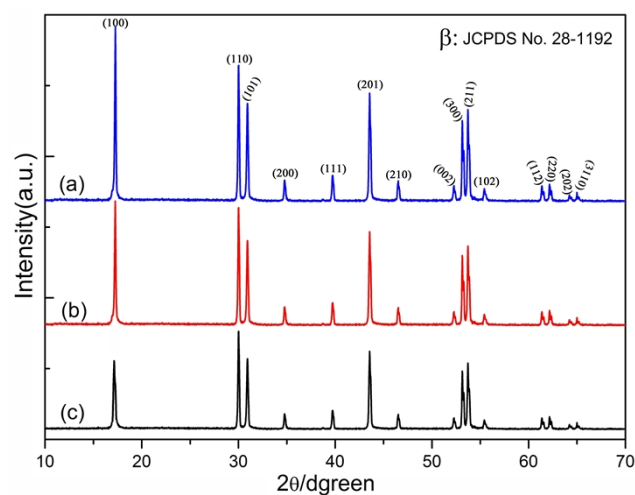

Fig. S1. XRD patterns for NaYF<sub>4</sub>: 20%Yb<sup>3+</sup>/2%Ho<sup>3+</sup> microrods with different size.

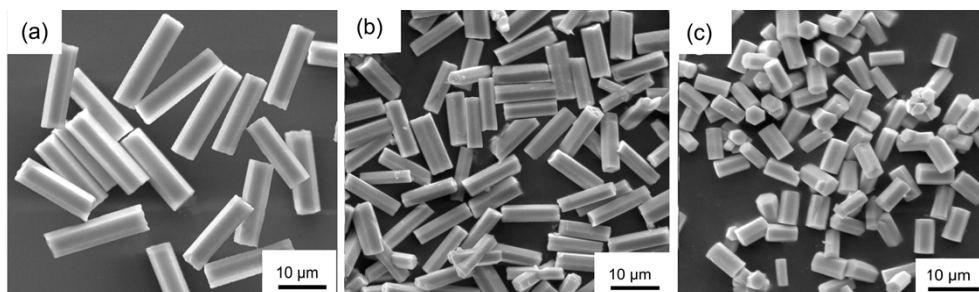

Fig. S2. SEM images for NaYF<sub>4</sub>: 20%Yb<sup>3+</sup>/2%Ho<sup>3+</sup> microrods with different size.
